# Supplementary material
Source: PubMed Central journal article supplement (PMC6880746)

Supplementary tables and figures (Whitman et al)

Table S1. Association of 8q24 SNPs with post-operative Gleason sum

| Locus                           | Post-operative GS |         |         | P   |
|---------------------------------|-------------------|---------|---------|-----|
|                                 | GS 2-6            | GS 7    | GS 8-10 |     |
| <b>Region1</b>                  |                   |         |         | 0.3 |
| <b>rs1447295 A</b>              |                   |         |         |     |
| CC                              | 32(64%)           | 11(22%) | 7(14%)  |     |
| CA                              | 17(45%)           | 16(42%) | 5(13%)  |     |
| AA                              | 6(60%)            | 3(30%)  | 1(10%)  |     |
| <b>Region2</b>                  |                   |         |         | 0.4 |
| <b>rs6983561 C</b>              |                   |         |         |     |
| AA                              | 11(50%)           | 7(32%)  | 4(18%)  |     |
| CA                              | 29(58%)           | 17(34%) | 4(8%)   |     |
| CC                              | 16(57%)           | 7(25%)  | 5(18%)  |     |
| <b>Region2</b>                  |                   |         |         | 0.8 |
| <b>rs13254738 C</b>             |                   |         |         |     |
| AA                              | 6(46%)            | 4(31%)  | 3(23%)  |     |
| CA                              | 26(59%)           | 13(30%) | 5(11%)  |     |
| CC                              | 22(56%)           | 12(31%) | 5(13%)  |     |
| <b>Region2</b>                  |                   |         |         | 0.2 |
| <b>Broad11934905</b>            |                   |         |         |     |
| <b>A</b>                        |                   |         |         |     |
| GG                              | 49(58%)           | 26(31%) | 9(11%)  |     |
| AG                              | 6(40%)            | 5(33%)  | 4(27%)  |     |
| <b>Region3</b>                  |                   |         |         | 0.7 |
| <b>rs6983267 G</b>              |                   |         |         |     |
| TT+GT                           | 14(58%)           | 6(25%)  | 4(17%)  |     |
| GG                              | 41(55%)           | 24(32%) | 9(12%)  |     |
| <b>Region3</b>                  |                   |         |         | 0.6 |
| <b>rs7000448 T</b>              |                   |         |         |     |
| CC                              | 6(40%)            | 6(40%)  | 3(20%)  |     |
| TC                              | 29(58%)           | 14(28%) | 7(14%)  |     |
| TT                              | 20(59%)           | 11(32%) | 3(9%)   |     |
| <b>Risk alleles<sup>1</sup></b> |                   |         |         | 0.5 |
| 0 to 5                          | 20(57%)           | 9(26%)  | 6(17%)  |     |
| 6 to 10                         | 36(55%)           | 22(34%) | 7(11%)  |     |
| <b>Risk alleles<sup>2</sup></b> |                   |         |         | 0.3 |
| 0 to 4                          | 14(56%)           | 7(28%)  | 4(16%)  |     |
| 5 to 7                          | 31(65%)           | 13(27%) | 4(8%)   |     |
| 8 to 10                         | 11(41%)           | 11(41%) | 5(18%)  |     |

**Table S2. Distribution of total number of at-risk genotypes by region**

| Total number of risk alleles | N (%)      |
|------------------------------|------------|
| <b>Region 1</b>              |            |
| 0                            | 58 (50.0%) |
| 1                            | 45 (38.8%) |
| 2                            | 13 (11.2%) |
| <b>Region 2</b>              |            |
| 0                            | 9 (8.0%)   |
| 1                            | 17 (15.0%) |
| 2                            | 31 (27.4%) |
| 3                            | 30 (26.6%) |
| 4                            | 21 (18.6%) |
| 5                            | 5 (4.4%)   |
| <b>Region 3</b>              |            |
| 0                            | 9 (8.0%)   |
| 1                            | 24 (21.2%) |
| 2                            | 40 (35.4%) |
| 3                            | 40 (35.4%) |

**Table S3. Association of total number of at-risk genotypes with age at diagnosis by region**

| Risk Locus | Total number of risk alleles | N  | Age at diagnosis |      |        |
|------------|------------------------------|----|------------------|------|--------|
|            |                              |    | Mean             | SD   | P      |
| <b>1</b>   | 0                            | 58 | 58.7             | 8.5  | 0.2954 |
|            | 1                            | 42 | 56.0             | 8.8  |        |
|            | 2                            | 12 | 56.1             | 10.8 |        |
| <b>2</b>   | 0-1                          | 25 | 58.9             | 9.7  | 0.1068 |
|            | 2-3                          | 60 | 58.4             | 8.5  |        |
|            | 4-5                          | 25 | 54.3             | 8.3  |        |
| <b>3</b>   | 0                            | 9  | 58.0             | 10.2 | 0.2791 |
|            | 1                            | 24 | 55.0             | 7.3  |        |
|            | 2                            | 39 | 59.5             | 7.6  |        |
|            | 3                            | 37 | 57.5             | 10.3 |        |

**Table S4. Association of total number of at-risk genotypes with pathological T stage by region**

| <b>Risk locus</b> | <b>Total number of risk alleles</b> | <b>pT2</b> | <b>pT3-4</b> | <b>P value</b> |
|-------------------|-------------------------------------|------------|--------------|----------------|
| <b>1</b>          | <i>0</i>                            | 34(68%)    | 16(32%)      | 0.0634         |
|                   | <i>1</i>                            | 19(49%)    | 20(51%)      |                |
|                   | <i>2</i>                            | 9(82%)     | 2(18%)       |                |
| <b>2</b>          | <i>0-1</i>                          | 17(77%)    | 5(23%)       | 0.2141         |
|                   | <i>2-3</i>                          | 29(57%)    | 22(43%)      |                |
|                   | <i>4-5</i>                          | 14(56%)    | 11(44%)      |                |
| <b>3</b>          | <i>0</i>                            | 5(83%)     | 1(17%)       | 0.6854         |
|                   | <i>1</i>                            | 14(61%)    | 9(39%)       |                |
|                   | <i>2</i>                            | 20(57%)    | 15(43%)      |                |
|                   | <i>3</i>                            | 21(62%)    | 13(38%)      |                |

**Table S5. Association between total number of at-risk genotypes and clinico-pathological features**

| <b>Variable</b>                  | <b>Total number of risk alleles</b> |                |                       | <b>P value</b> |
|----------------------------------|-------------------------------------|----------------|-----------------------|----------------|
|                                  | <b>N</b>                            | <b>Mean±SD</b> | <b>Median (range)</b> |                |
| <b>CaP family history</b>        |                                     |                |                       | 0.3852         |
| <i>No</i>                        | 54                                  | 5.9±2.3        | 6 (0-10)              |                |
| <i>Yes</i>                       | 44                                  | 5.5±2.1        | 6 (0-9)               |                |
| <b>Pathologic T stage</b>        |                                     |                |                       | 0.1696         |
| <i>pT2</i>                       | 63                                  | 5.6+2.3        | 6 (0-10)              |                |
| <i>pT3-4</i>                     | 39                                  | 6.2+2.1        | 6 (0-10)              |                |
| <b>Postoperative Gleason sum</b> |                                     |                |                       | 0.7567         |
| <i>2 - 6</i>                     | 57                                  | 5.9+2.1        | 6 (0-10)              |                |
| <i>7</i>                         | 31                                  | 5.9+2.5        | 6 (0-9)               |                |
| <i>8 - 10</i>                    | 14                                  | 5.6+2.6        | 5.5 (1-10)            |                |

**Figure S1. KM PSA recurrence-free survival curves across total number of at-risk genotypes at region 1**

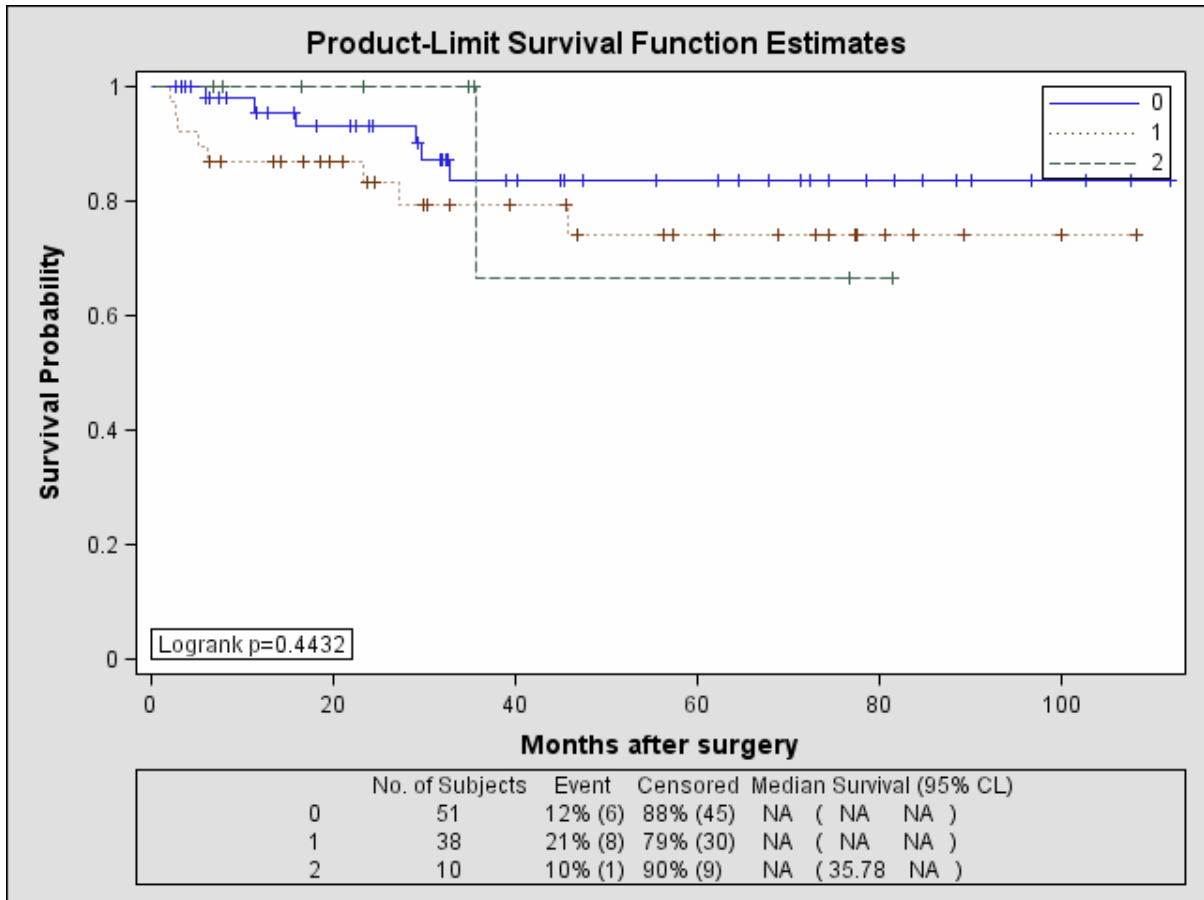

**Figure S2. KM PSA recurrence-free survival curves across total number of at-risk genotypes at region 2**

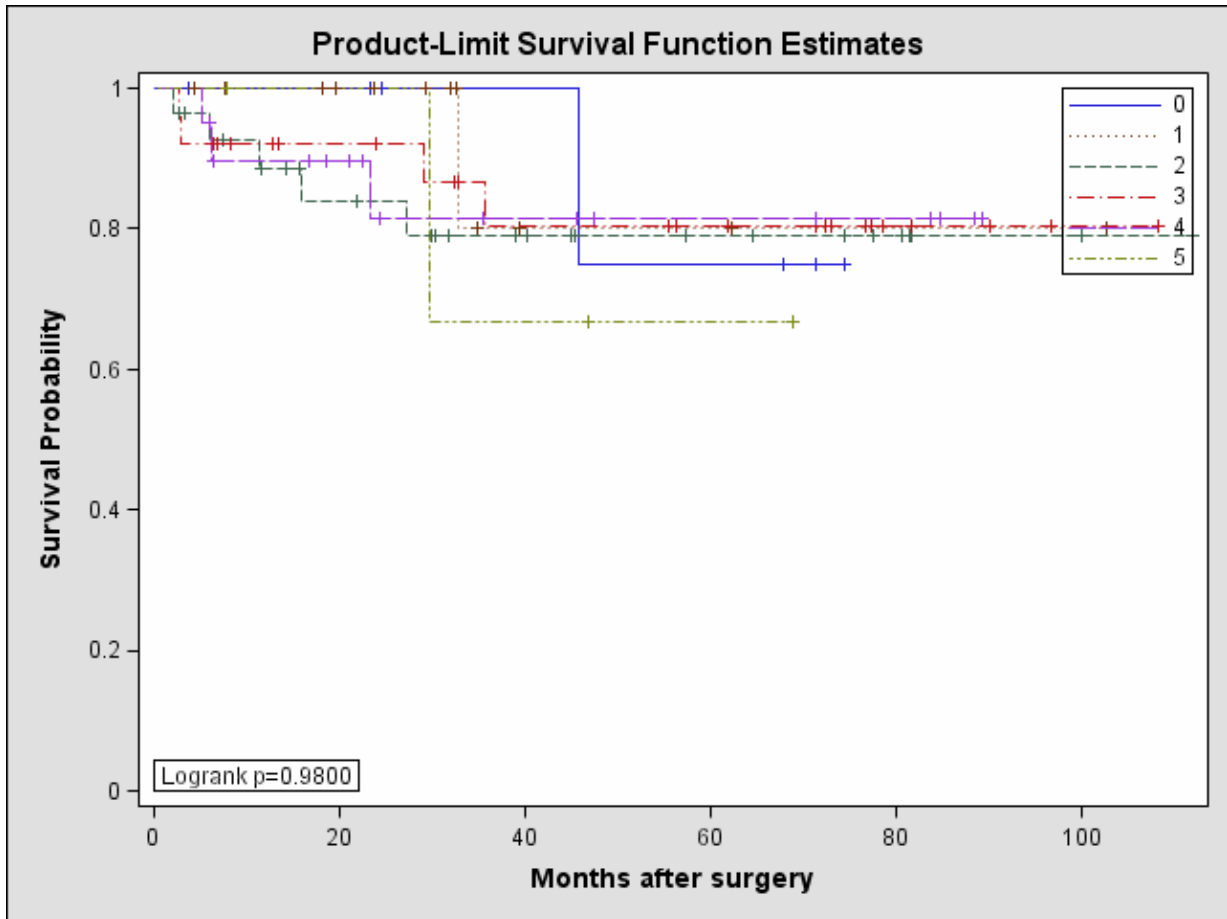

**Figure S3. KM PSA recurrence-free survival curves across total number of at-risk genotypes at region 3**

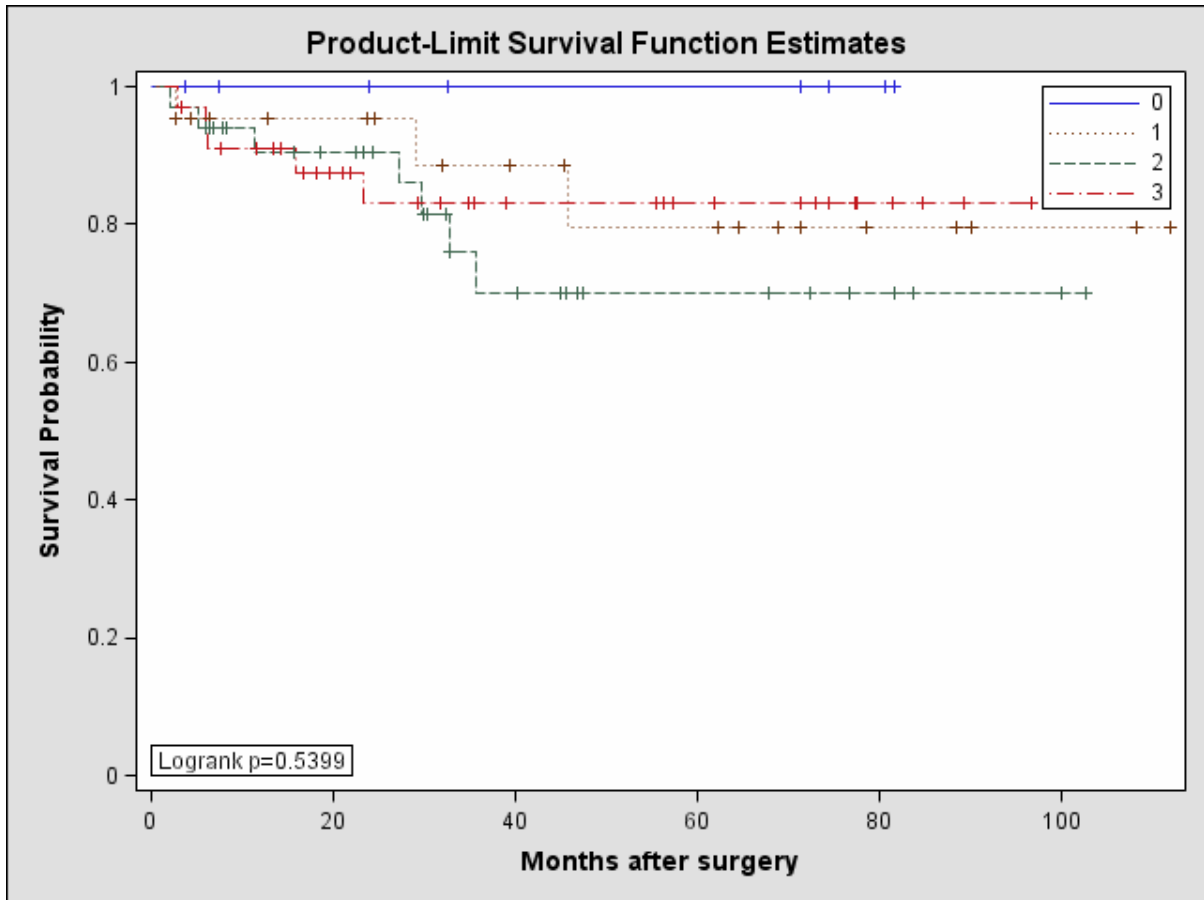

**Figure S4. Association between total number of at-risk genotypes and age at diagnosis**

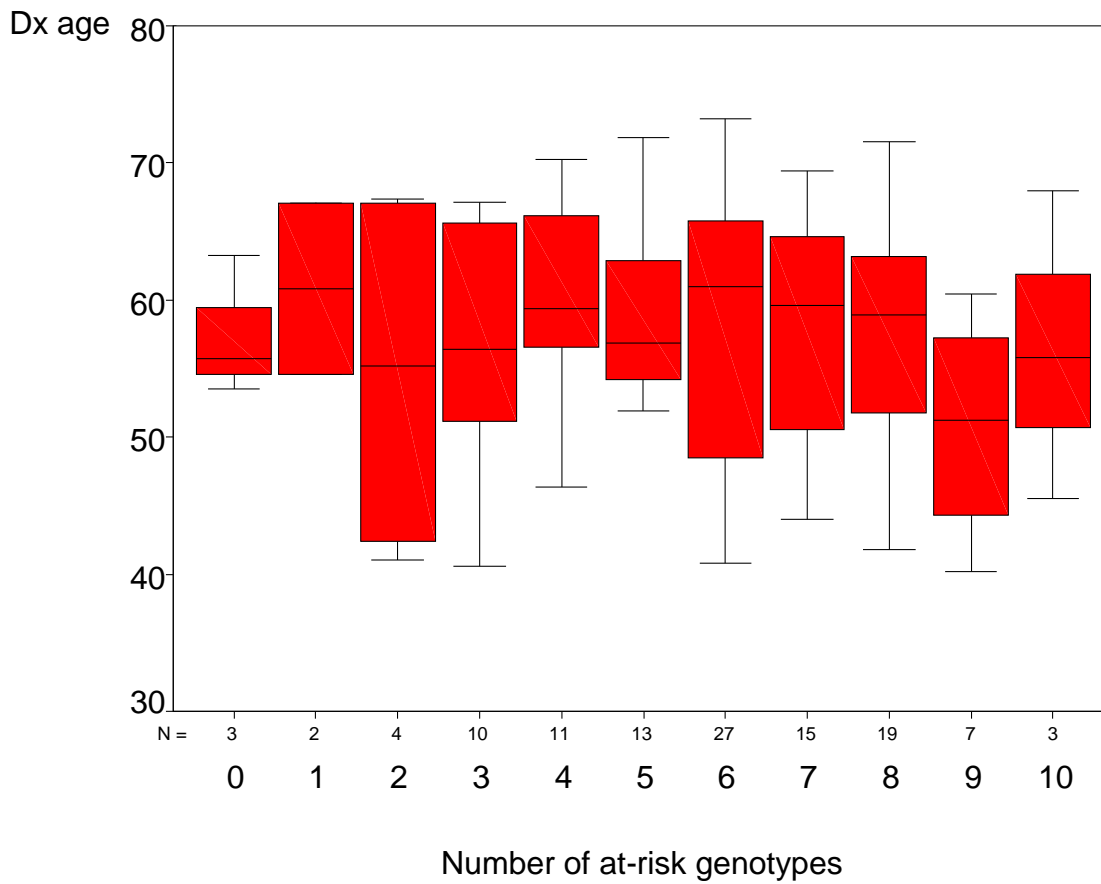

Supplement: NIHMS1054121-supplement-2.pdf [file NIHMS1054121-supplement-2.pdf]
